# Supplementary material for: Polypyrrole-Assisted Ag Doping Strategy to Boost Co(OH)2 Nanosheets on Ni Foam as a Novel Electrode for High-Performance Hybrid Supercapacitors
Source: MDPI journal article supplement (doi:10.3390/nano12223982), 2022-11-11
Supplement: s1 [file s1]

## Supplementary Materials

# Polypyrrole-Assisted Ag Doping Strategy to Boost Co(OH)<sub>2</sub> Nanosheets on Ni Foam as a Novel Electrode for High-Performance Hybrid Supercapacitors

Hammad Mueen Arbi <sup>1,†</sup>, Anuja A. Yadav <sup>2,†</sup>, Yedluri Anil Kumar <sup>1,3</sup>, Md  
Moniruzzaman <sup>4</sup>, Salem Alzahmi <sup>3,5,\*</sup> and Ihab M. Obaidat <sup>1,3,\*</sup>

<sup>1</sup> Department of Physics, United Arab Emirates University, Al Ain 15551, United Arab Emirates

<sup>2</sup> Department of Automotive Engineering, Yeungnam University, 280 Daehak-ro, Gyeongsan 38541, Gyeongbuk, Korea

<sup>3</sup> National Water and Energy Center, United Arab Emirates University, Al Ain 15551, United Arab Emirates

<sup>4</sup> Department of Chemical and Biological Engineering, Gachon University, 1342 Seongnam-daero, Seongnam-si 13120, Gyeonggi-do, Korea

<sup>5</sup> Department of Chemical & Petroleum Engineering, United Arab Emirates University, Al Ain 15551, United Arab Emirates

\* Correspondence: s.alzahmi@uaeu.ac.ae (S.A.); iobaidat@uaeu.ac.ae (I.M.O.)

† These authors contributed equally to this work.

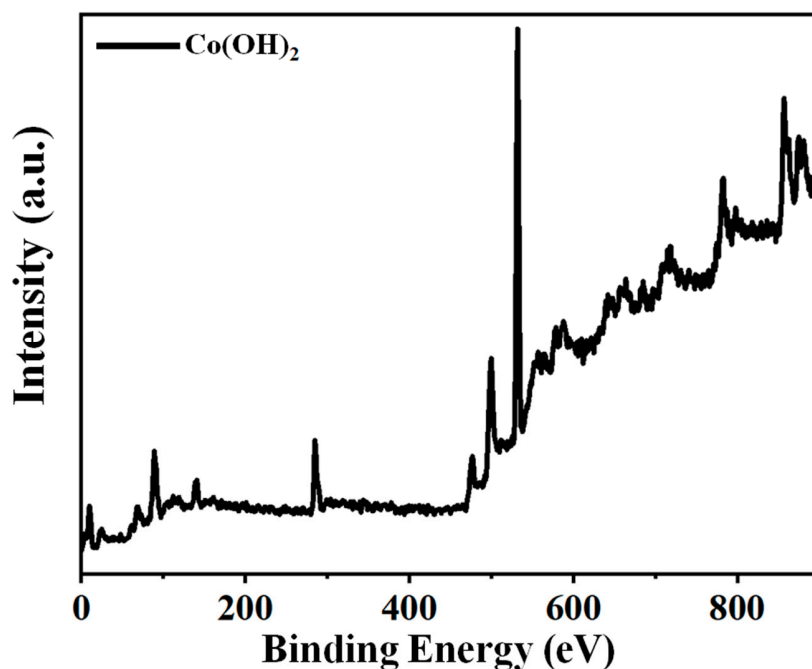

**Fig. S1** XPS survey spectrum of pure Co(OH)<sub>2</sub> nanoparticles electrode grown on Ni foam.

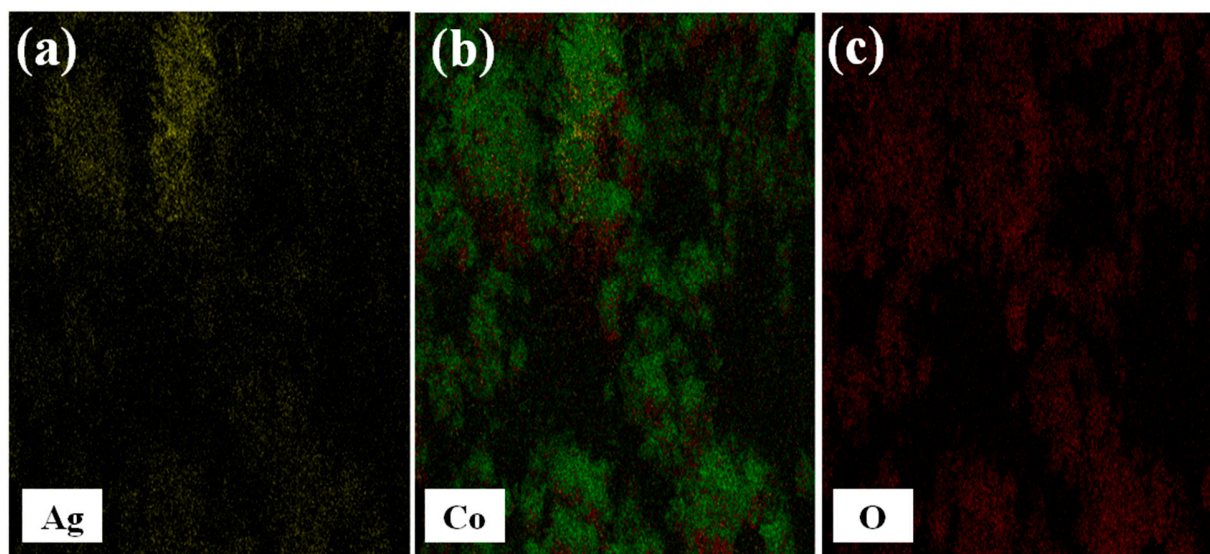

**Fig. S2 (a–c)** EDS elemental distribution mapping of Ag-doped@Co(OH)<sub>2</sub>@polypyrrole NSs grown on Ni foam.
